# Supplementary material for: Compositional Analysis of Whole Grains, Processed Grains, Grain Co-Products, and Other Carbohydrate Sources with Applicability to Pet Animal Nutrition
Source: MDPI journal article supplement (doi:10.3390/foods5020023), 2016-03-25
Supplement: s1 [file s1]

# Supplementary Materials: Compositional Analysis of Whole Grains, Processed Grains, Grain Co-Products, and Other Carbohydrate Sources with Applicability to Pet Animal Nutrition

Alison N. Beloshapka, Preston R. Buff, George C. Fahey, Jr. and Kelly S. Swanson

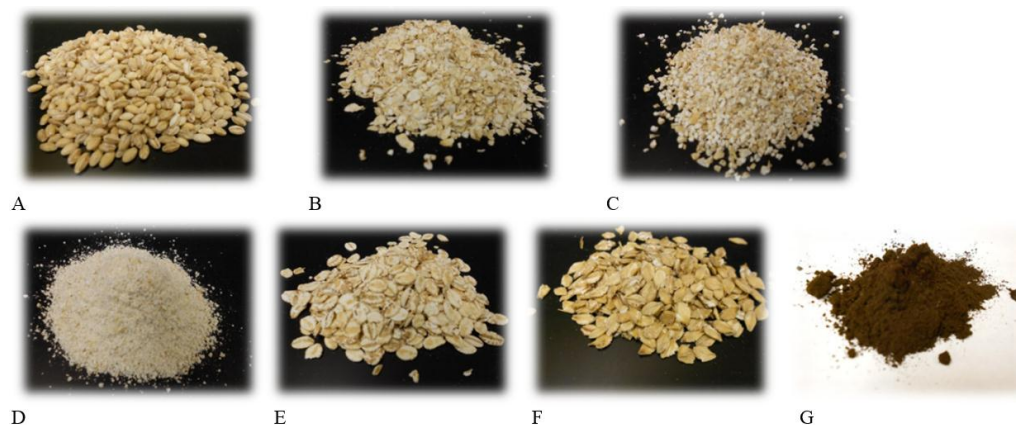

**Figure S1.** Photographs of barley samples before analysis. Samples included: whole pearled barley (A); barley flake (B); cut barley (C); ground pearled barley (D); pearled barley flakes (E); steamed rolled barley (F); malted barley (G).

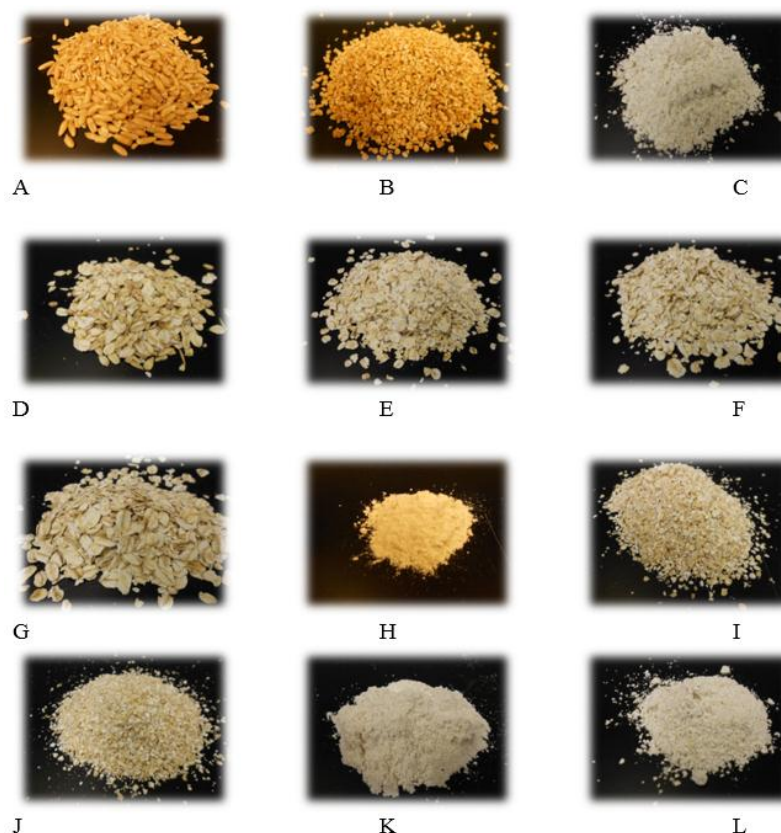

**Figure S2.** Photographs of oat samples before analysis. Samples included: groats (A); steel cut groats (B); ground steamed groats (C); steamed rolled oat groats (D); instant oats (E); quick oats (F); regular rolled oats (G); oat fiber (H); oat bran #1 (I); oat bran #2 (J); oat flour (K); oatmeal ground (L).

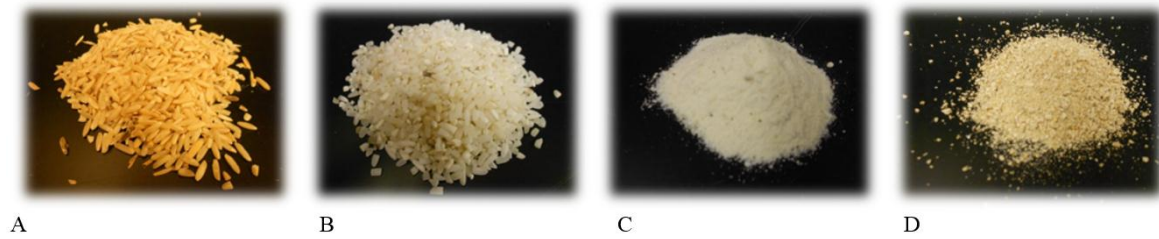

**Figure S3.** Photographs of rice samples before analysis. Samples included: brown rice (A); polished rice (B); rice flour (C); rice bran (D).

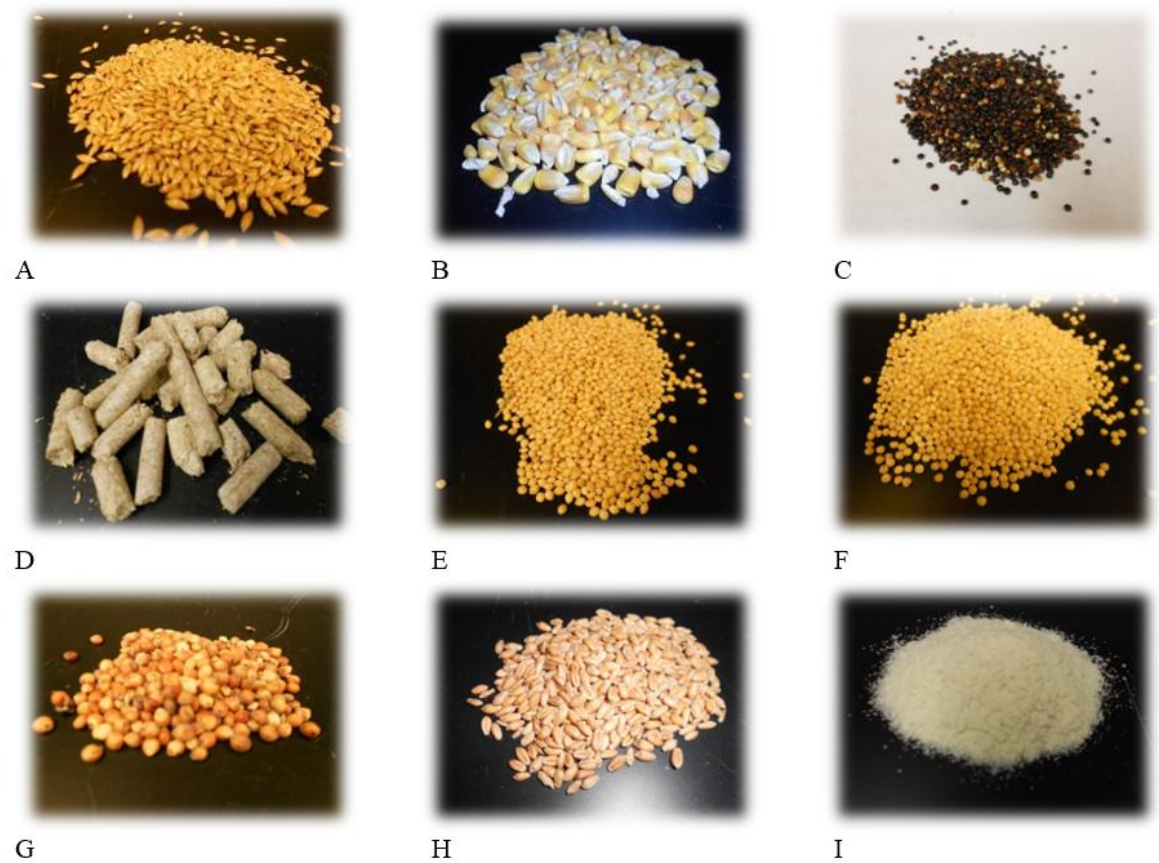

**Figure S4.** Photographs of miscellaneous cereals and carbohydrate sources before analysis. Samples included: canary grass seed (A); whole yellow corn (B); quinoa (C); organic spelt hull pellets (D); whole millet (E); hulled millet (F); sorghum (G); whole wheat (H); potato flake (I).
